# Supplementary material for: The gut microbiota of larvae of Rhynchophorus ferrugineus Oliver (Coleoptera: Curculionidae)
Source: PubMed Central journal article supplement (PMC4060583; doi:10.1186/1471-2180-14-136), 2014-05-30

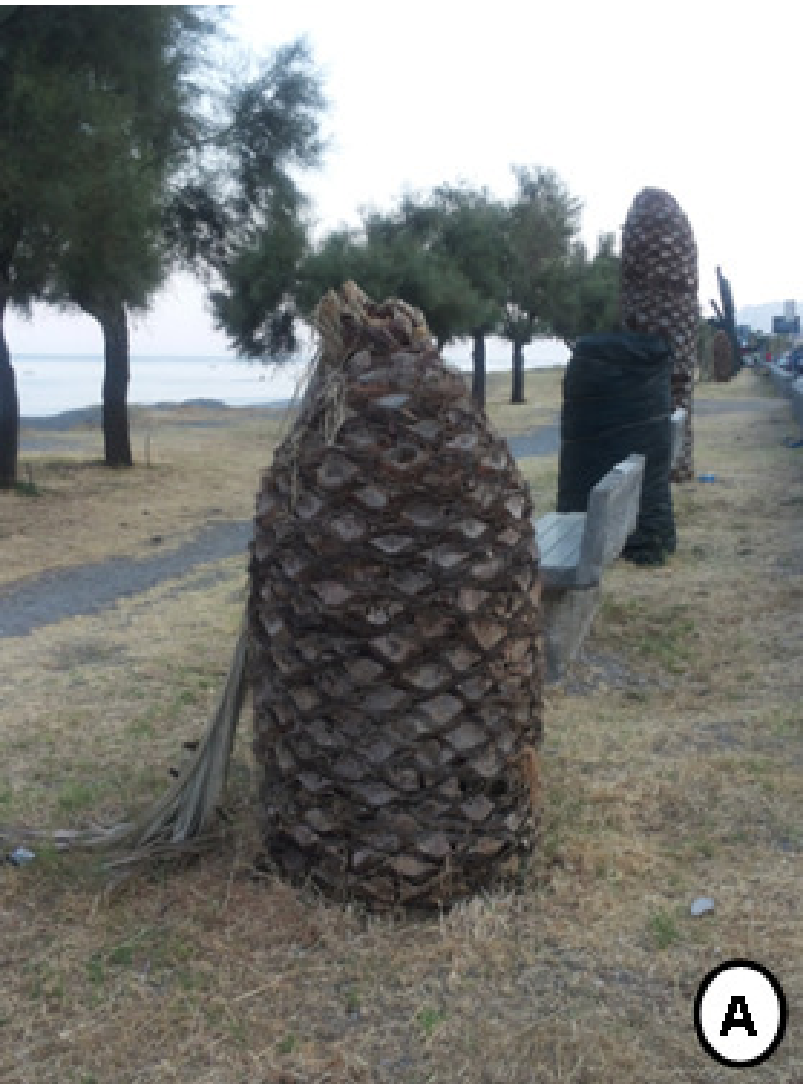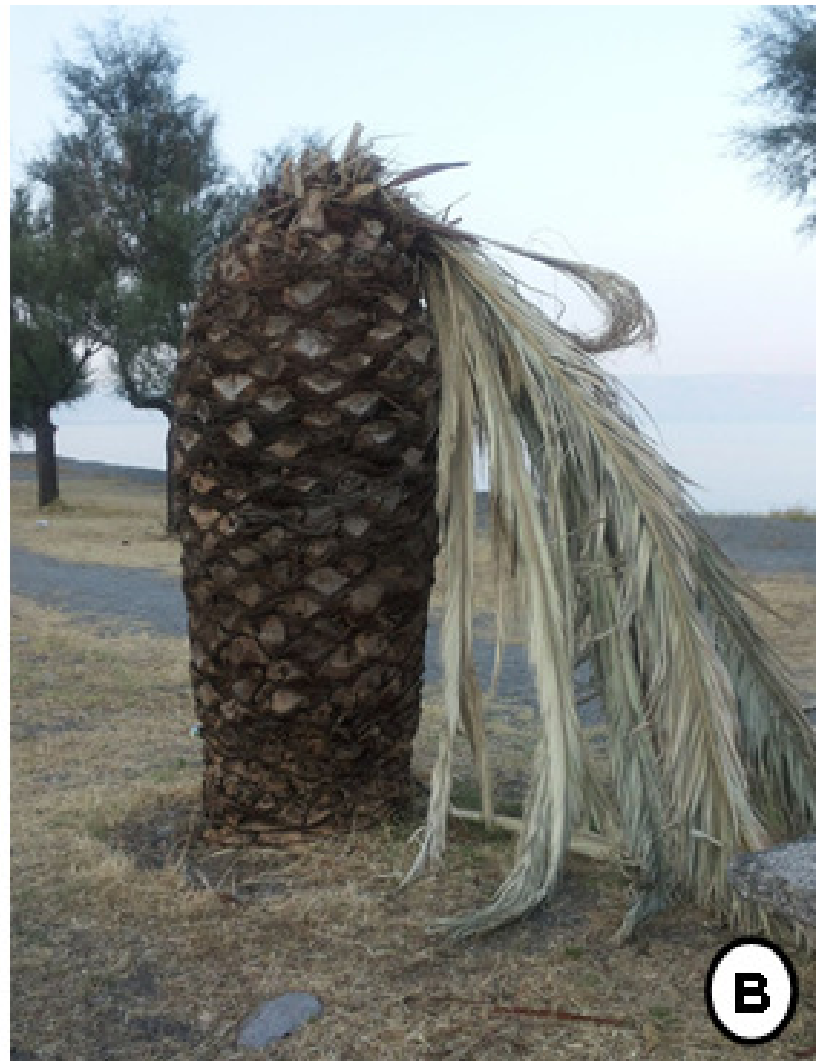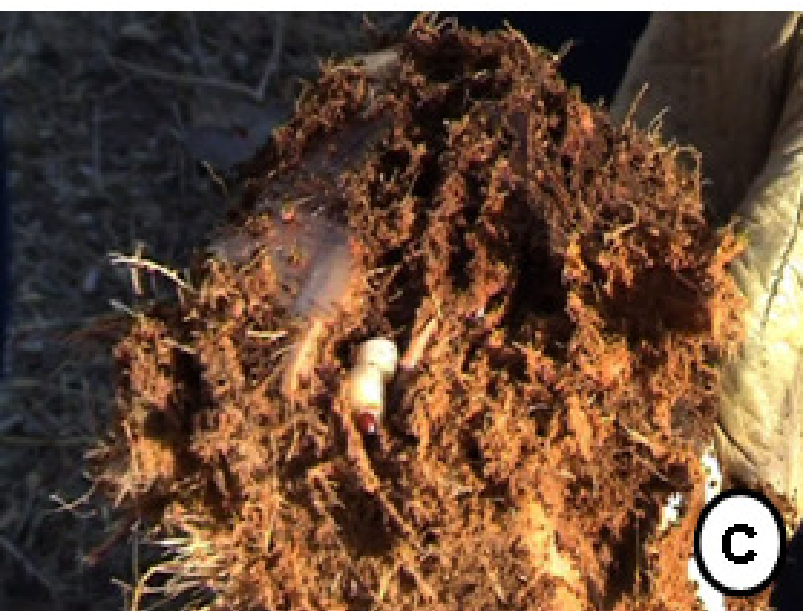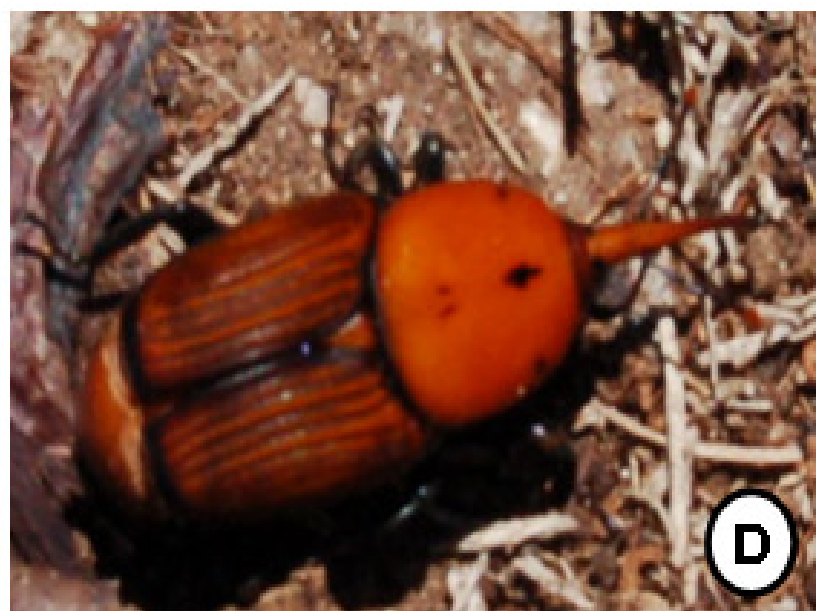

Supplement: 1471-2180-14-136-S1.pdf [file 1471-2180-14-136-S1.pdf]
