# Supplementary material for: The gut microbiota of larvae of Rhynchophorus ferrugineus Oliver (Coleoptera: Curculionidae)
Source: PubMed Central journal article supplement (PMC4060583; doi:10.1186/1471-2180-14-136), 2014-05-30
Supplement: 1471-2180-14-136-S4.pdf [file 1471-2180-14-136-S4.pdf]

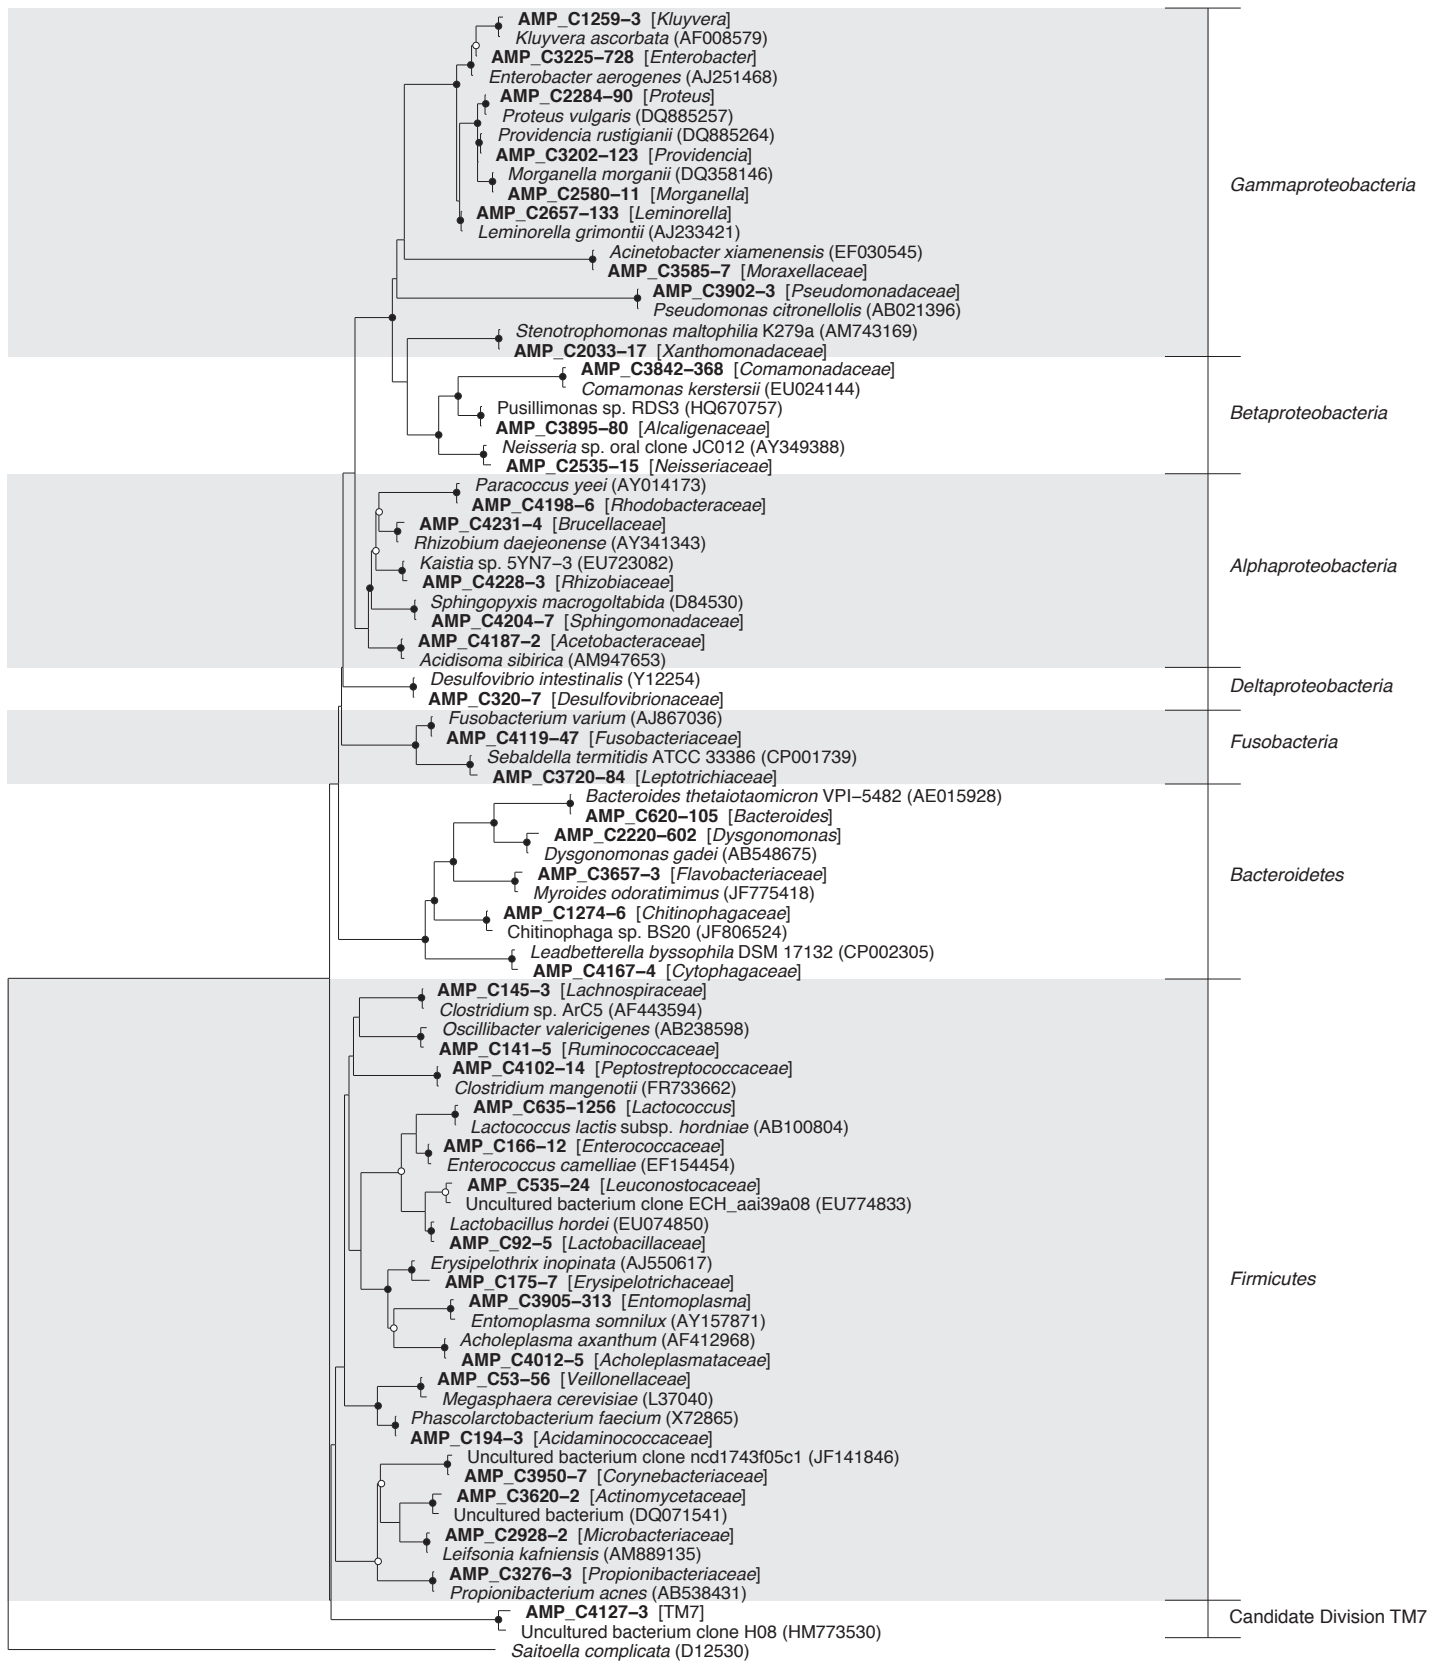

0.10  
 Bootstrap (n=1000), % strength  
 ○ 60-75%  
 ● >75-100%
