# Supplementary material for: The gut microbiota of larvae of Rhynchophorus ferrugineus Oliver (Coleoptera: Curculionidae)
Source: PubMed Central journal article supplement (PMC4060583; doi:10.1186/1471-2180-14-136), 2014-05-30
Supplement: 1471-2180-14-136-S6.pdf [file 1471-2180-14-136-S6.pdf]

### Additional file 6

Table. Alignments of 16S rRNA gene sequences of cellulolytic bacterial strains isolated from the RPW gut by enrichment cultures on cellulose (Butera et al., 2012) and the 97% RDP 454 consensus sequences of the RPW microbiota. Only identities above 90% are shown.

| RPW cellulolytic Isolate    | Genbank Accession Number | BLASTN best match RDP_Consensus_97% (number of sequences) | Identity % (nt/nt) | Score (bits) | E-value |
|-----------------------------|--------------------------|-----------------------------------------------------------|--------------------|--------------|---------|
| <i>Pseudomonas sp</i> R-5   | JN167543                 | cluster_3902 (3)                                          | 95 (304/317)       | 518          | 1e-147  |
|                             |                          | singleton_cluster_3928                                    | 92 (296/319)       | 459          | 7e-130  |
|                             |                          | cluster_3626 (4)                                          | 90 (291/322)       | 416          | 4e-117  |
| <i>Pseudomonas sp</i> R-8   | JN167546                 | cluster_3902 (3)                                          | 99 (315/317)       | 579          | 5e-166  |
|                             |                          | singleton_cluster_3928                                    | 94 (303/319)       | 497          | 1e-141  |
|                             |                          | singleton_cluster_2983                                    | 93 (303/324)       | 475          | 6e-135  |
| <i>Pseudomonas sp</i> R-9   | JN167547                 | cluster_3902 (3)                                          | 93 (274/292)       | 436          | 3e-123  |
|                             |                          | singleton_cluster_2983                                    | 92 (236/256)       | 363          | 6e-101  |
|                             |                          | singleton_cluster_3928                                    | 90 (266/293)       | 387          | 3e-108  |
| <i>Pseudomonas sp</i> R-15  | JN167552                 | cluster_3902 (3)                                          | 93 (277/297)       | 436          | 2e-123  |
|                             |                          | singleton_cluster_3928                                    | 91 (272/298)       | 399          | 3e-112  |
| <i>Enterobacter sp</i> R-10 | JN167548                 | cluster_3487 (15)                                         | 98 (259/264)       | 460          | 2e-130  |
|                             |                          | cluster_3410 (30)                                         | 98 (259/264)       | 460          | 2e-130  |
|                             |                          | cluster_3264 (76)                                         | 98 (259/264)       | 460          | 2e-130  |
|                             |                          | cluster_3184 (21)                                         | 98 (259/264)       | 460          | 2e-130  |
|                             |                          | cluster_3104 (17)                                         | 98 (259/264)       | 460          | 2e-130  |

BLASTN 2.2.24+

Reference: Zheng Zhang, Scott Schwartz, Lukas Wagner, and Webb Miller (2000), "A greedy algorithm for aligning DNA sequences", J Comput Biol 2000; 7(1-2):203-14.

Database:RDP\_Consensi\_97.fa 3,863 sequences; 1,289,650 total letters.
